# Supplementary material
Source: PubMed Central journal article supplement (PMC2639045)
Supplement: bgn274_1.pdf [file bgn274_1.pdf]

## Supplemental Figure 1

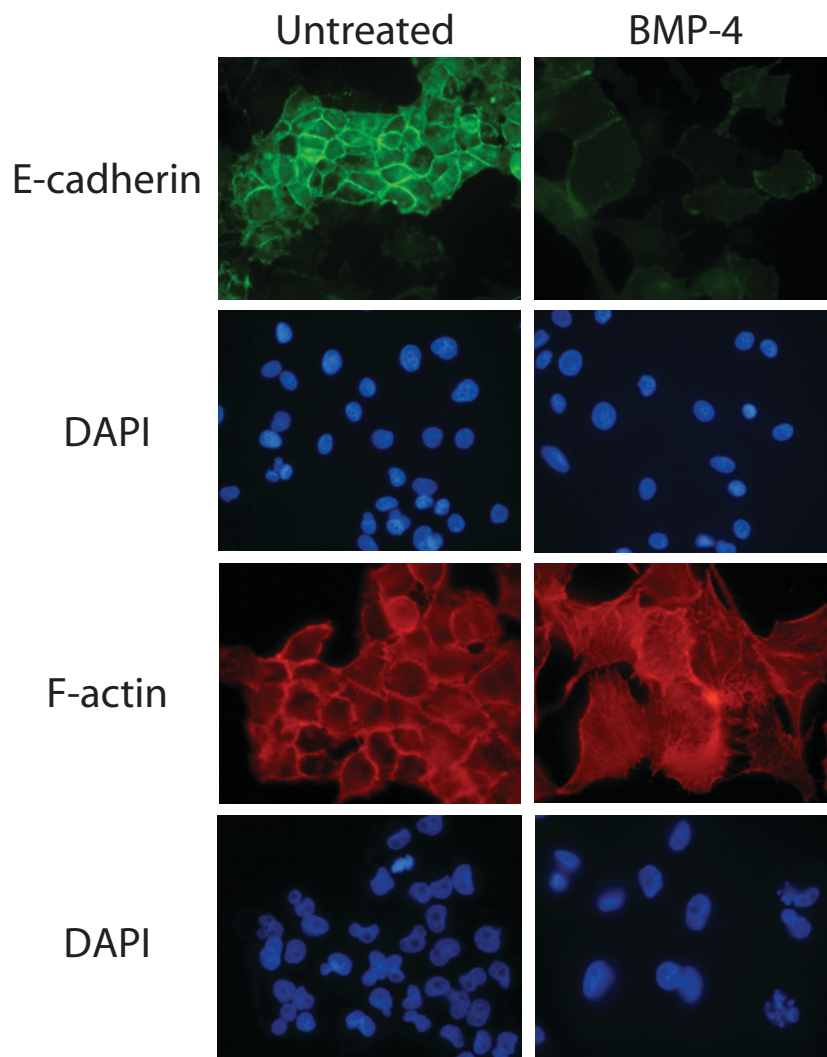

**Supplementary Fig. 1. BMP-4 Induces E-cadherin Relocalization and Actin Reorganization.** Immunofluorescence of the epithelial marker, E-cadherin (green) and localization of F-actin (red) to assay for EMT. DAPI (blue) was used to stain the nuclei.

## Supplemental Figure 2

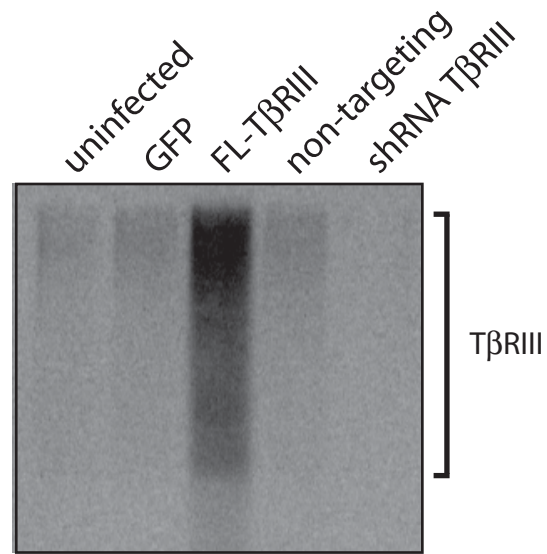

**Supplementary Fig. 2. TβRIII levels are altered by adenoviral infection.** Autoradiograph of the level of TβRIII as determined by binding and crosslinking of [<sup>125</sup>I]-TGF-β to Panc-1 cells adenovirally infected (50 M.O.I.) with GFP control, wild-type HA-tagged TβRIII-IRES-GFP (FL-TβRIII), a non-targeting shRNA control or shRNA against TβRIII, as indicated. The image is representative of 3 independent experiments.
